# Supplementary material for: Core-level photoemission spectra of Mo0.3Cu0.7Sr2ErCu2Oy, a superconducting perovskite derivative. Unconventional structure–property relationships
Source: Royal Society of Chemistry journal article supplement (doi:10.1039/c5dt00459d), 2015-01-01
Supplement: c5dt00459d1.pdf [file c5dt00459d1.pdf]

## Supporting Materials

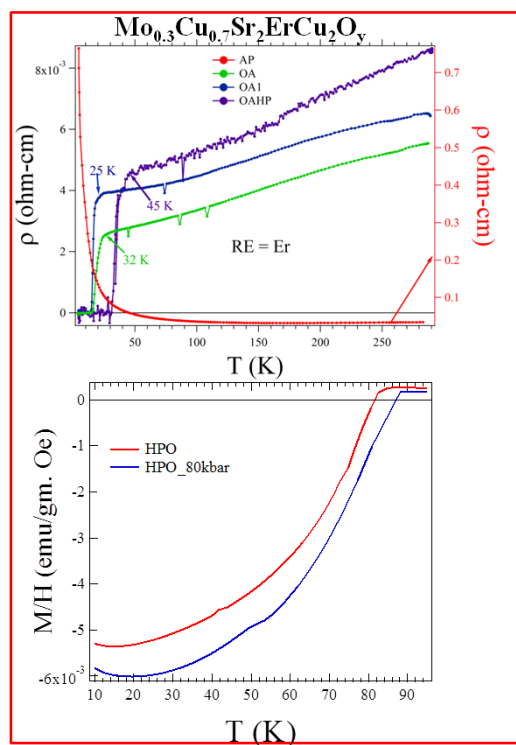

**Figure 1.** Temperature dependence of resistivity and magnetic susceptibility for the  $\text{Mo}_{0.3}\text{Cu}_{0.7}\text{Sr}_2\text{ErCu}_2\text{O}_y$  samples. The superconducting transitions are highlighted.

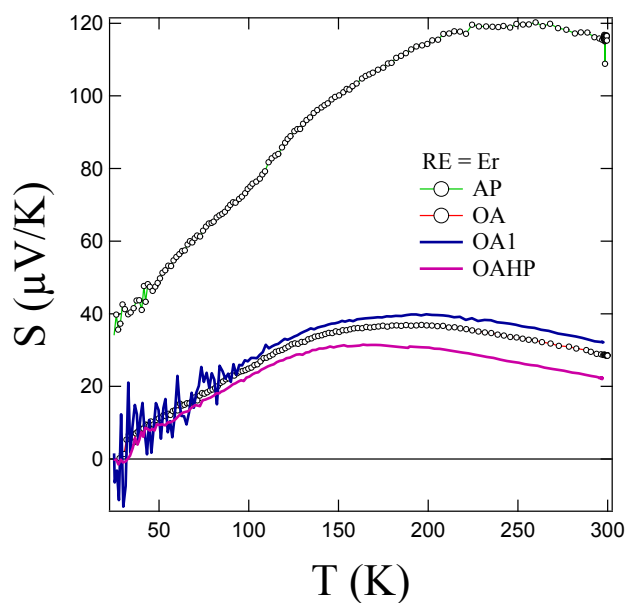

**Figure 2.** Temperature variation of thermoelectric power (TEP) for the  $\text{Mo}_{0.3}\text{Cu}_{0.7}\text{Sr}_2\text{ErCu}_2\text{O}_y$  samples.

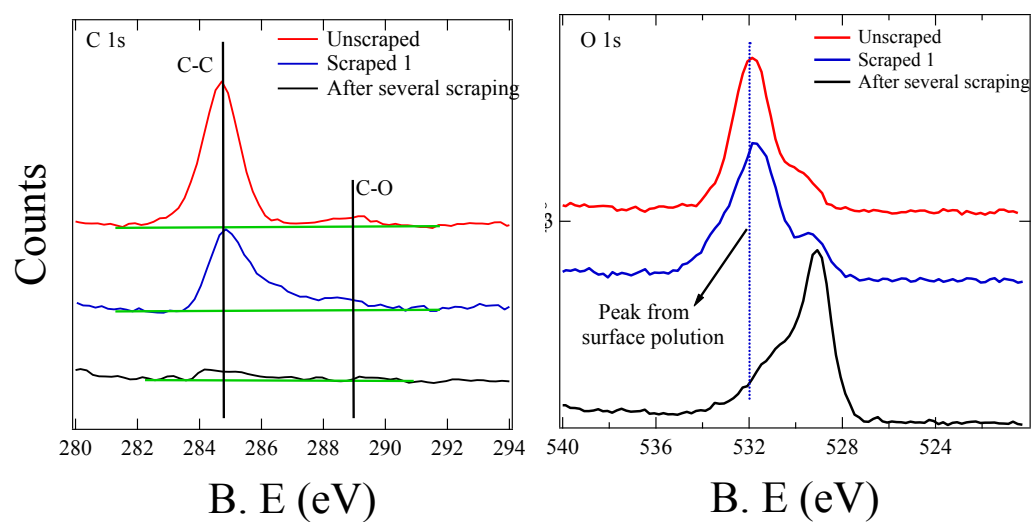

**Figure 3.** C 1s and O 1s core level XPS spectra for the AP material before and after several scraping at room temperature in the ultra-high vacuum.

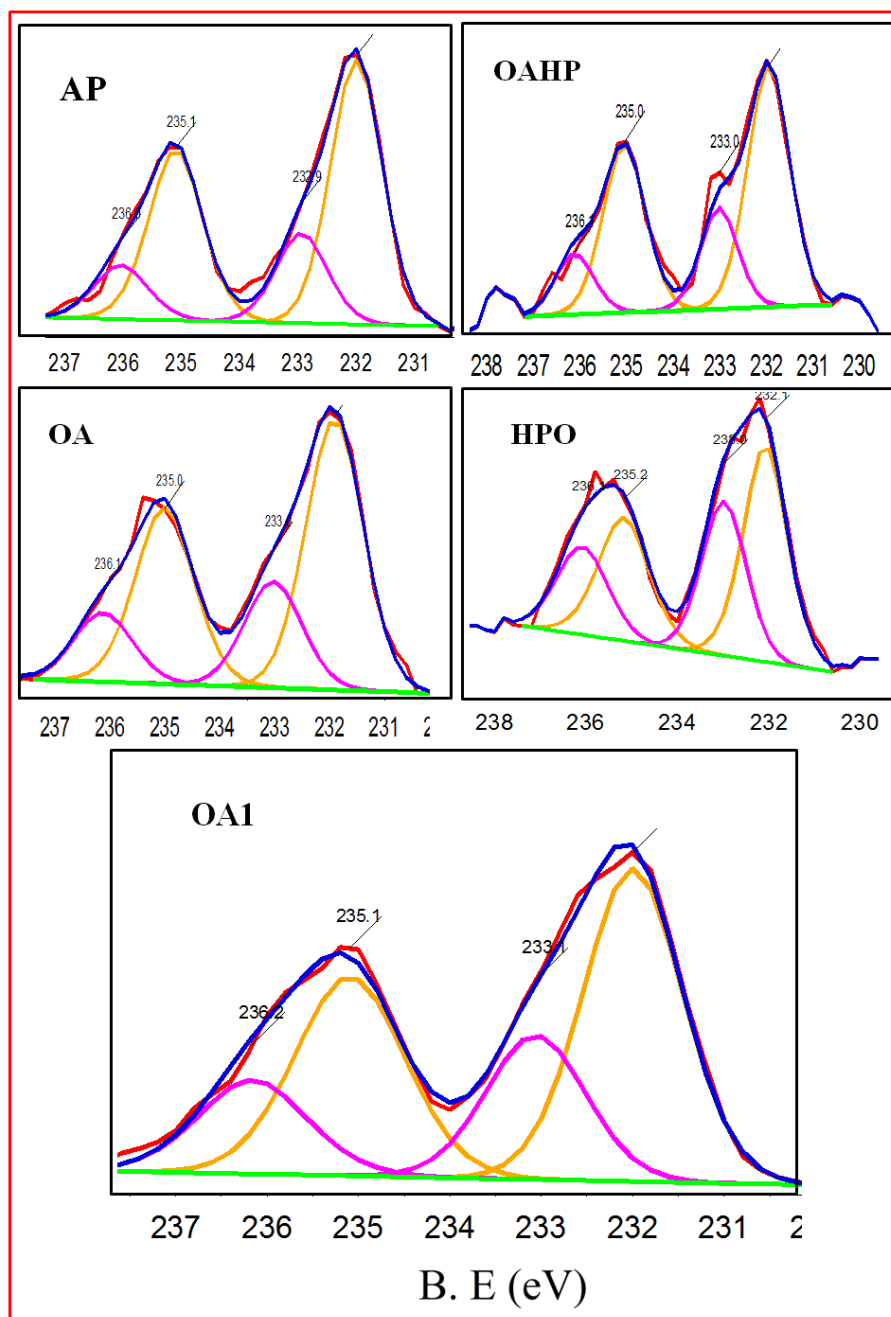

Figure 4. Fitting of the core level Mo 3d energy region for  $\text{Mo}_{0.3}\text{Cu}_{0.7}\text{Sr}_2\text{ErCu}_2\text{O}_y$  samples.

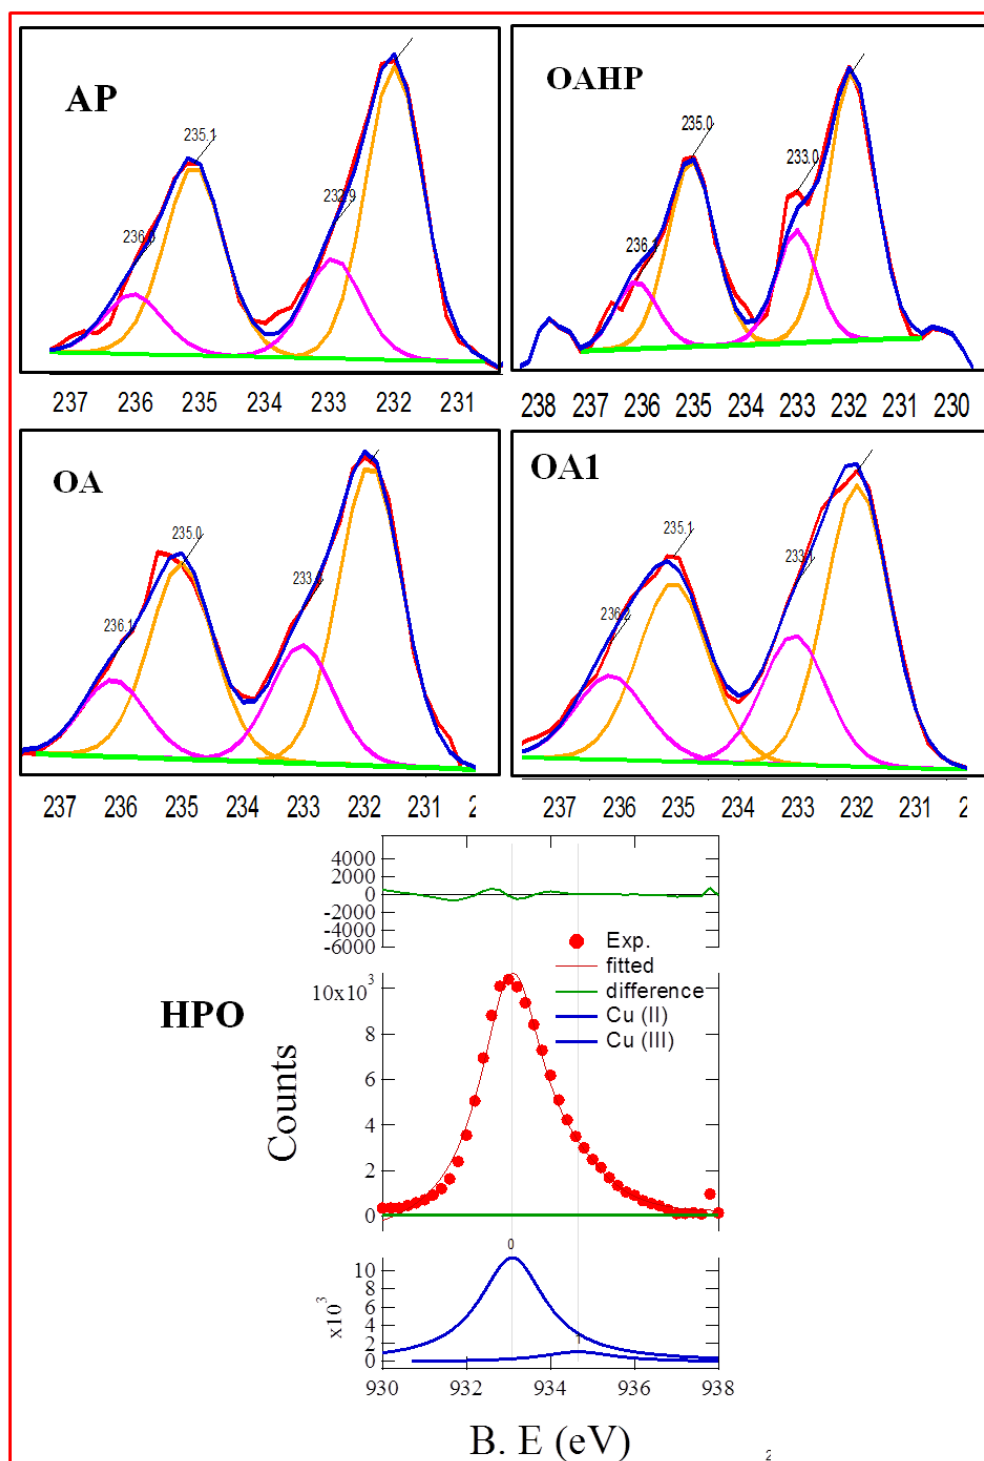

Figure 5. Fitting of the core level Cu 2p energy region for  $\text{Mo}_{0.3}\text{Cu}_{0.7}\text{Sr}_2\text{ErCu}_2\text{O}_y$  samples.
